# Supplementary material for: Training deep neural density estimators to identify mechanistic models of neural dynamics
Source: eLife journal article supplement (doi:10.7554/elife.56261), 2020-09-17
Supplement: supp [file elife-56261-supp-v1.zip]

Archive with 15 entries (15 files):
- elife_poa_e56261_Transparent_Reporting_File.pdf
- elife_poa_e56261_Appendix_1_figure_1.pdf
- elife_poa_e56261_Appendix_1_figure_2.pdf
- elife_poa_e56261_Appendix_1_figure_3.pdf
- elife_poa_e56261_Appendix_1_figure_4.pdf
- elife_poa_e56261_Appendix_1_figure_5.pdf
- elife_poa_e56261_Appendix_1_figure_6.pdf
- elife_poa_e56261_Appendix_1_figure_7.pdf
- elife_poa_e56261_Appendix_1_figure_8.pdf
- elife_poa_e56261_Appendix_1_figure_9.pdf
- elife_poa_e56261_Appendix_1_figure_10.pdf
- elife_poa_e56261_Appendix_1_figure_11.pdf
- elife_poa_e56261_Appendix_1_figure_12.pdf
- elife_poa_e56261_Appendix_1_figure_13.pdf
- elife_poa_e56261_Appendix_1_figure_14.pdf
