# Supplementary figures and images for: Training deep neural density estimators to identify mechanistic models of neural dynamics
Source: eLife journal article supplement (doi:10.7554/elife.56261), 2020-09-17

**a**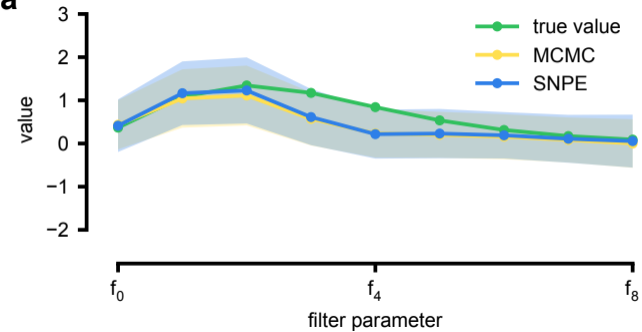**b**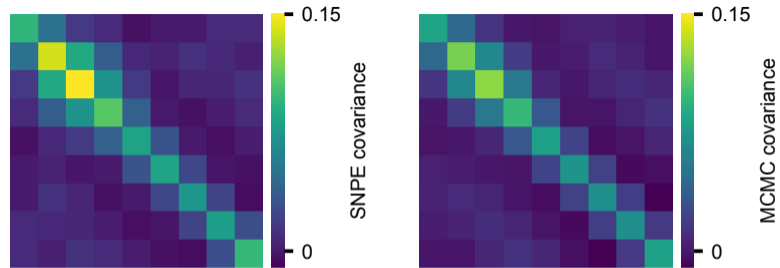

Supplement: supp [file elife-56261-supp-v1.zip › elife_poa_e56261_Appendix_1_figure_1.pdf]

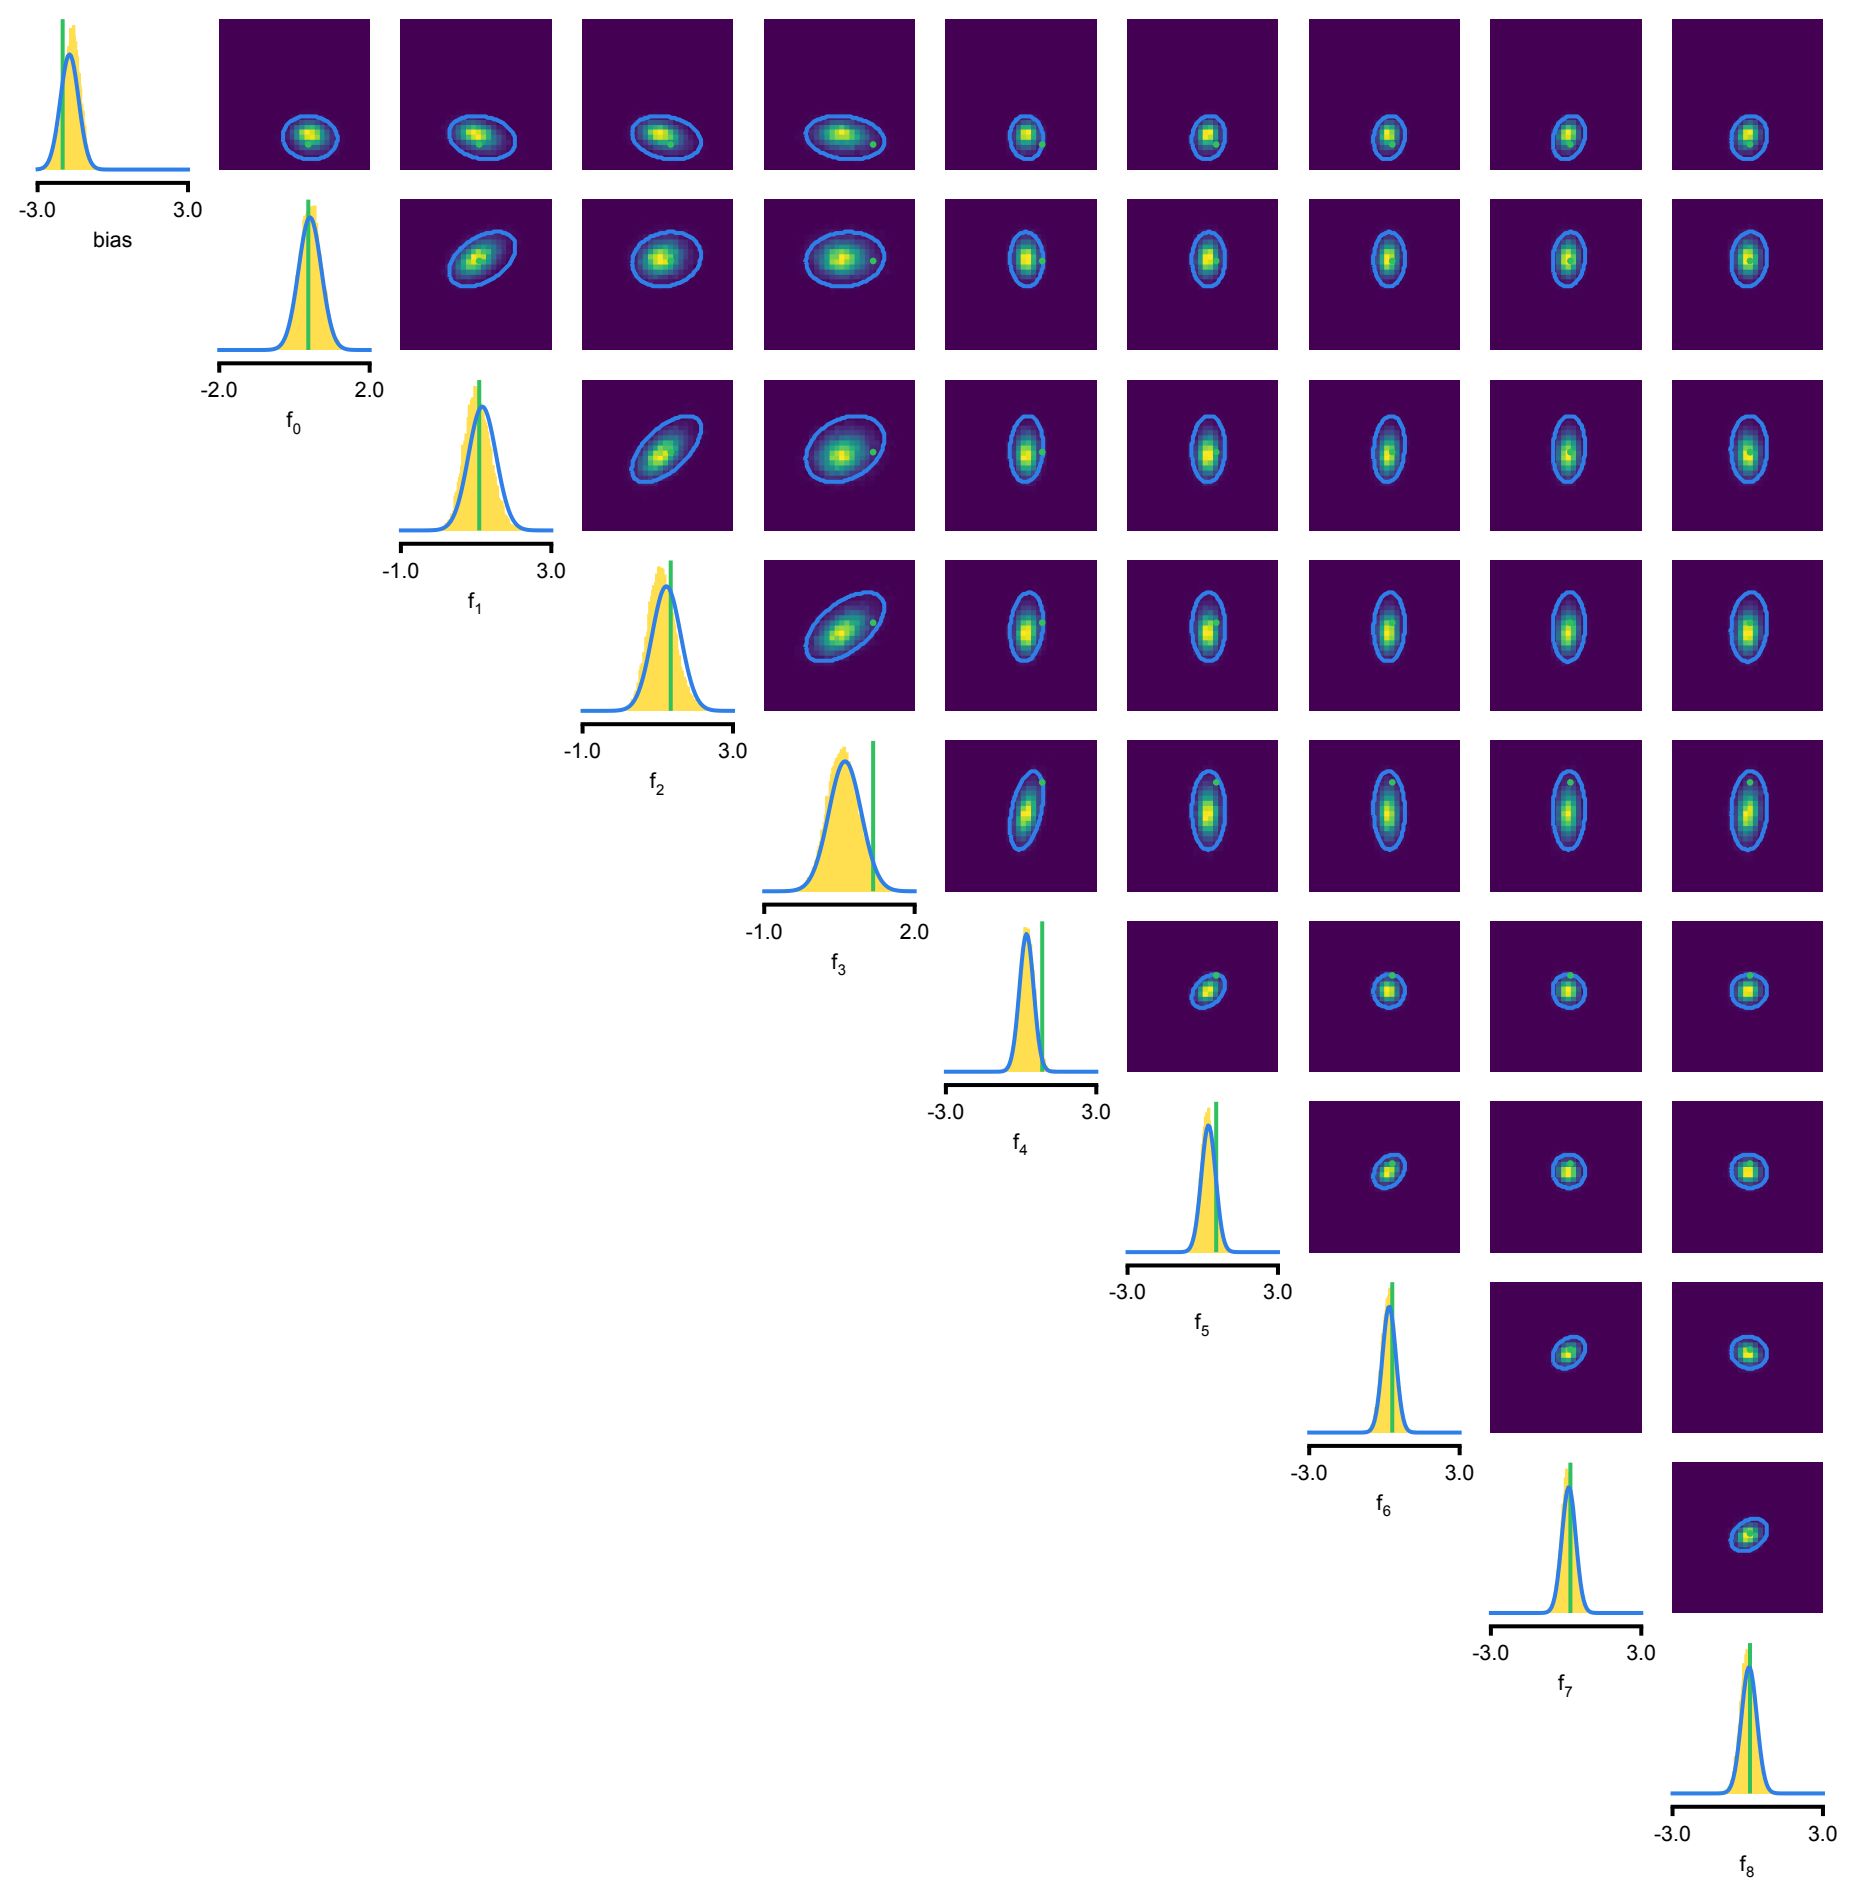

Supplement: supp [file elife-56261-supp-v1.zip › elife_poa_e56261_Appendix_1_figure_2.pdf]

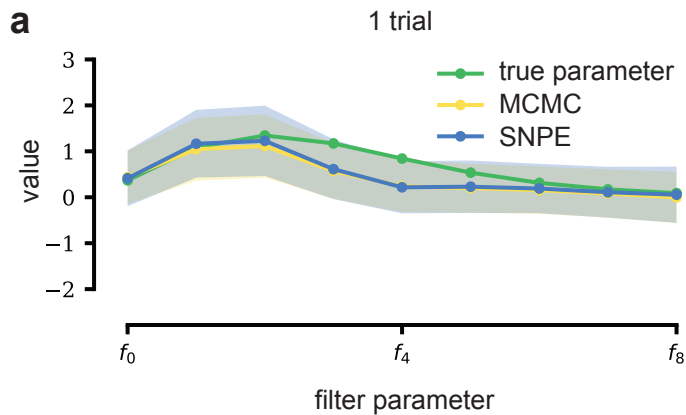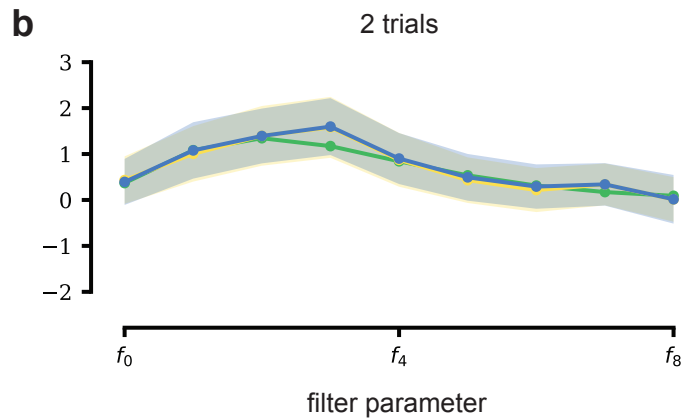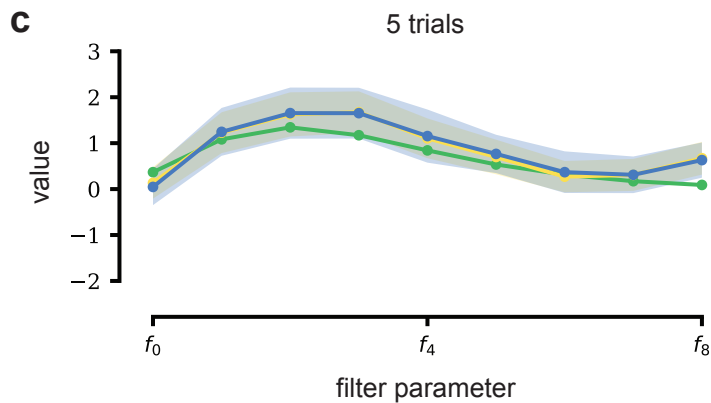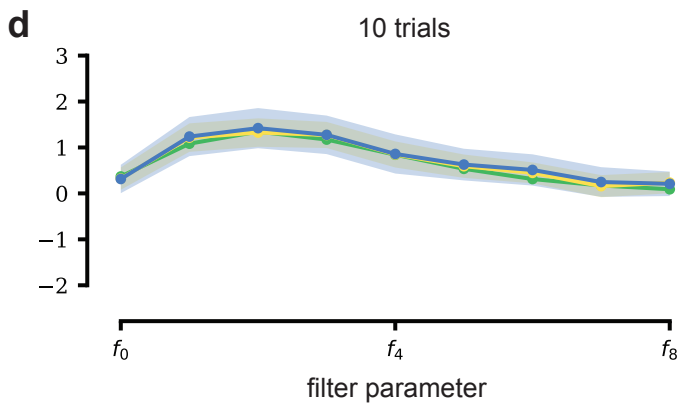

Supplement: supp [file elife-56261-supp-v1.zip › elife_poa_e56261_Appendix_1_figure_3.pdf]

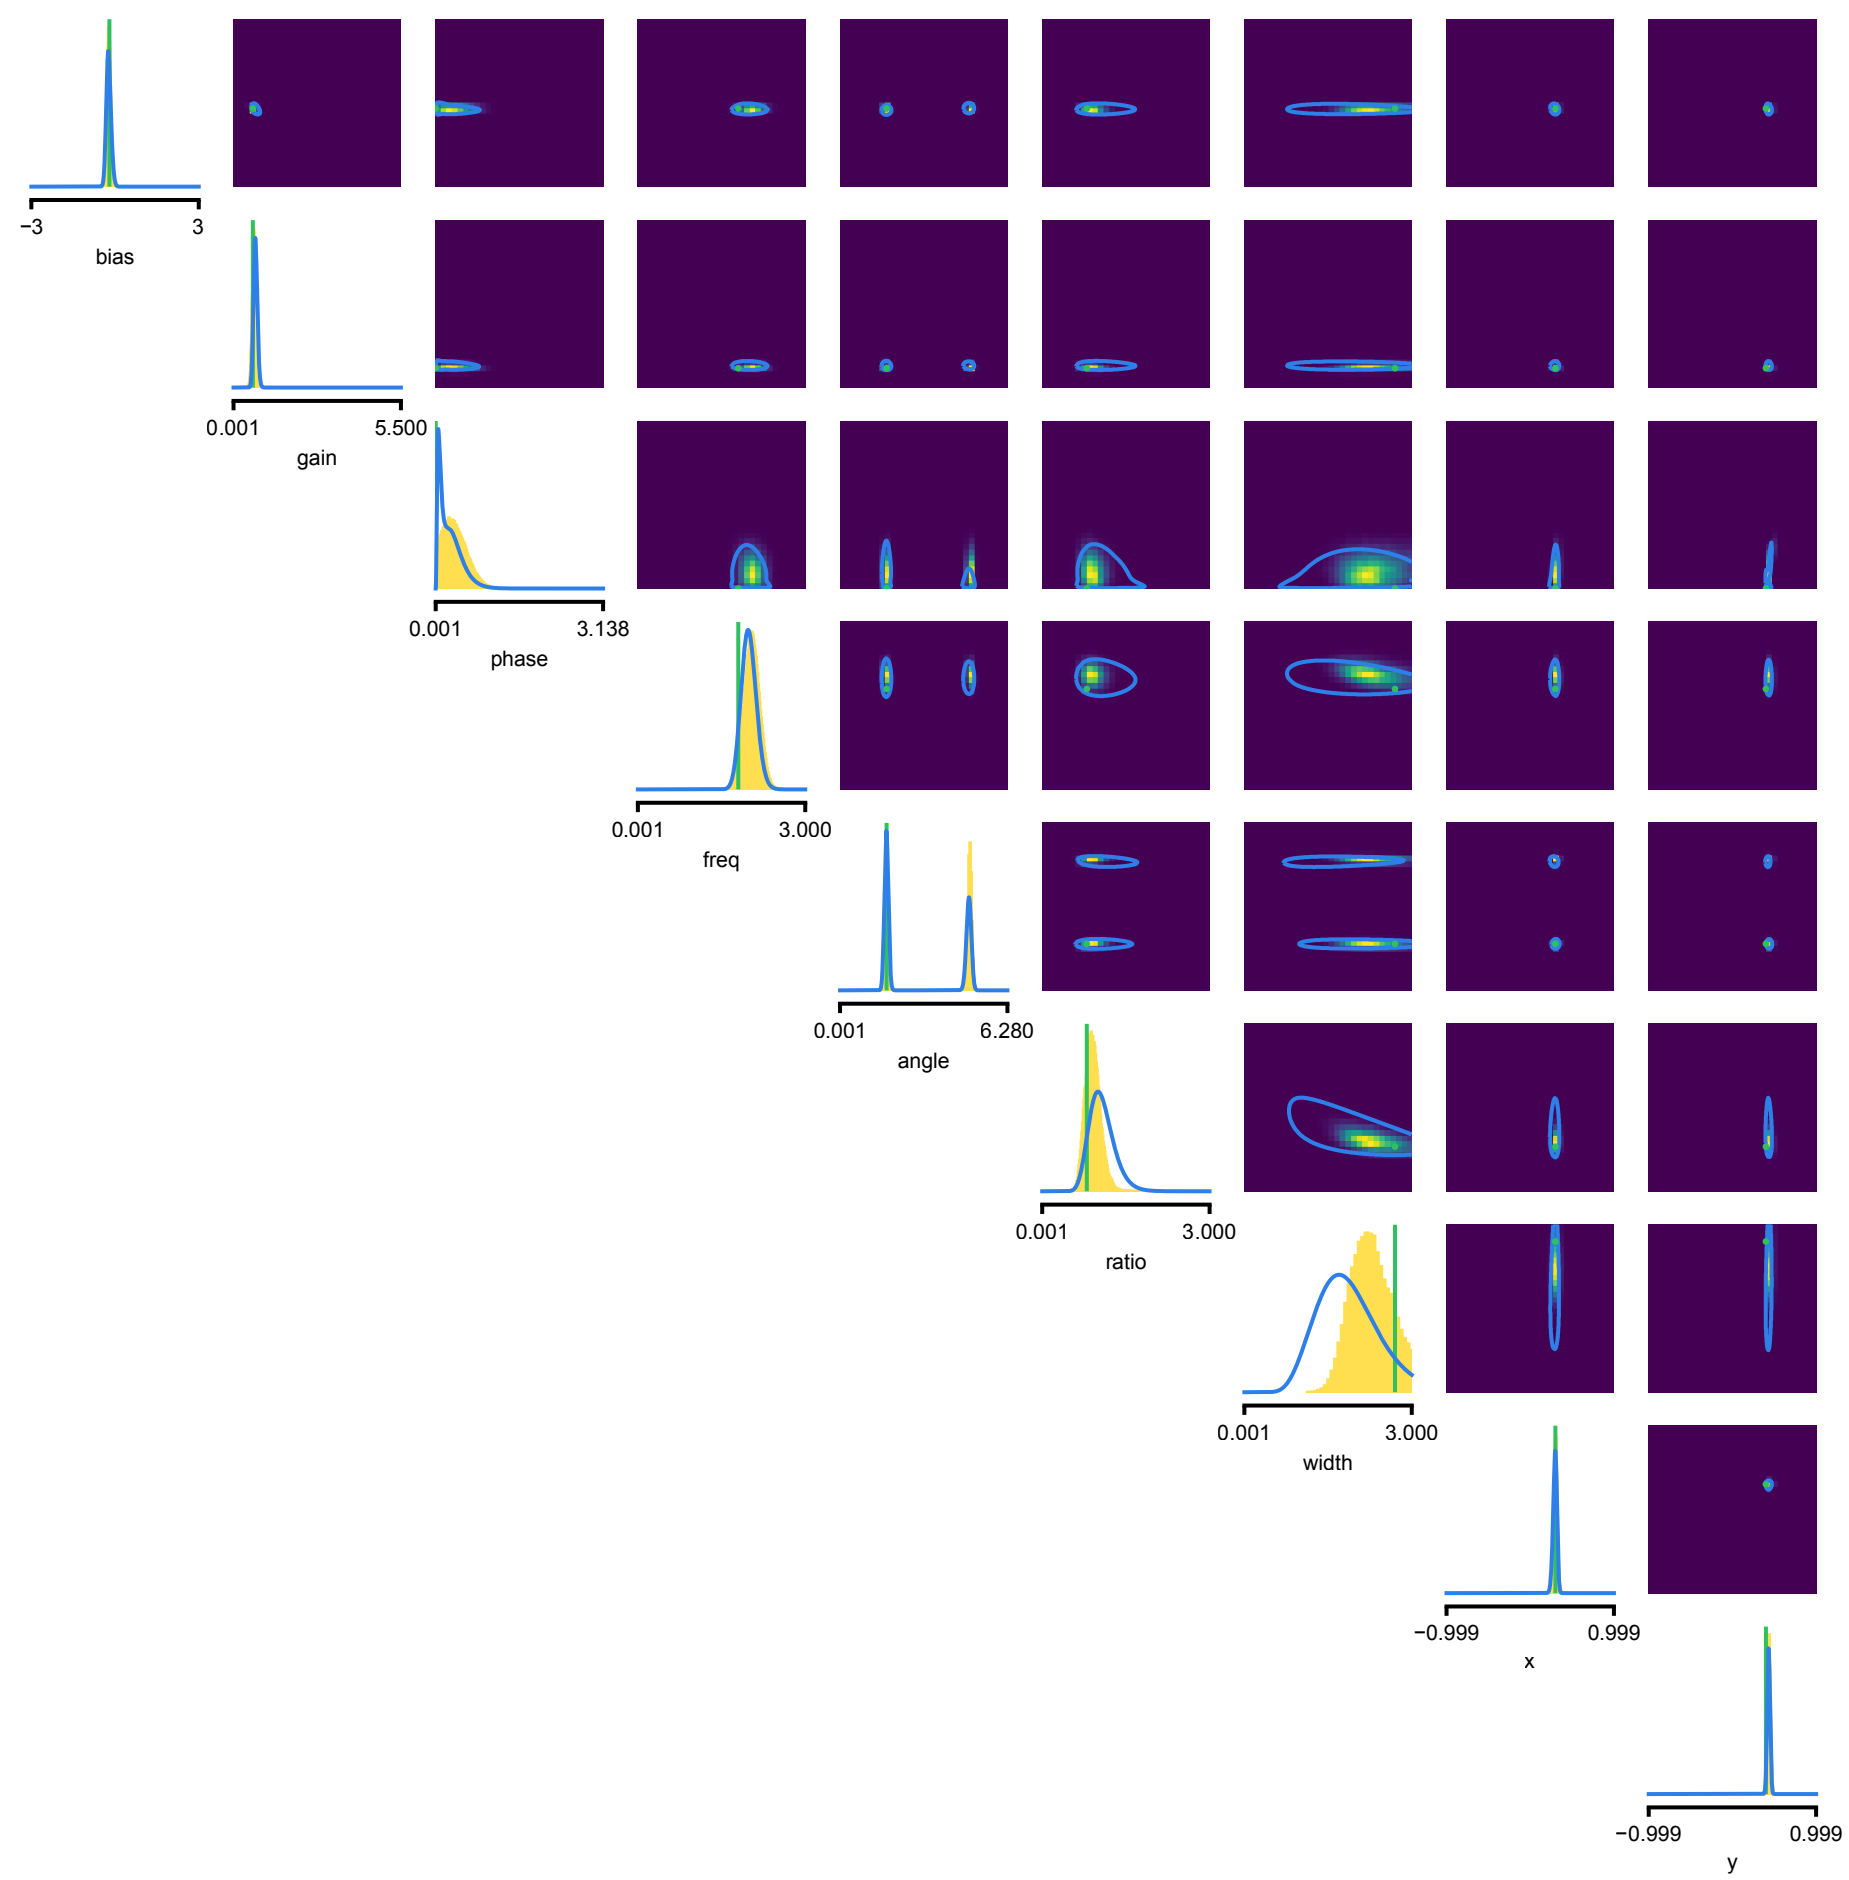

Supplement: supp [file elife-56261-supp-v1.zip › elife_poa_e56261_Appendix_1_figure_4.pdf]

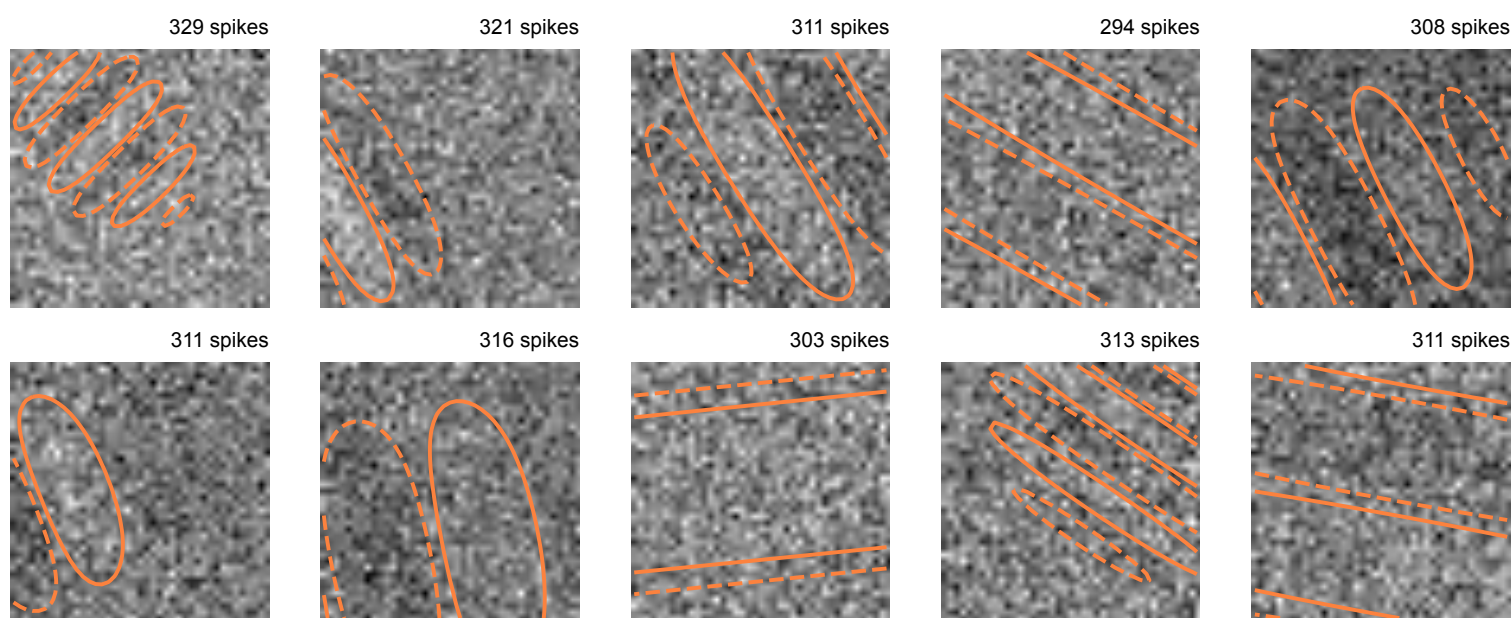

**b**

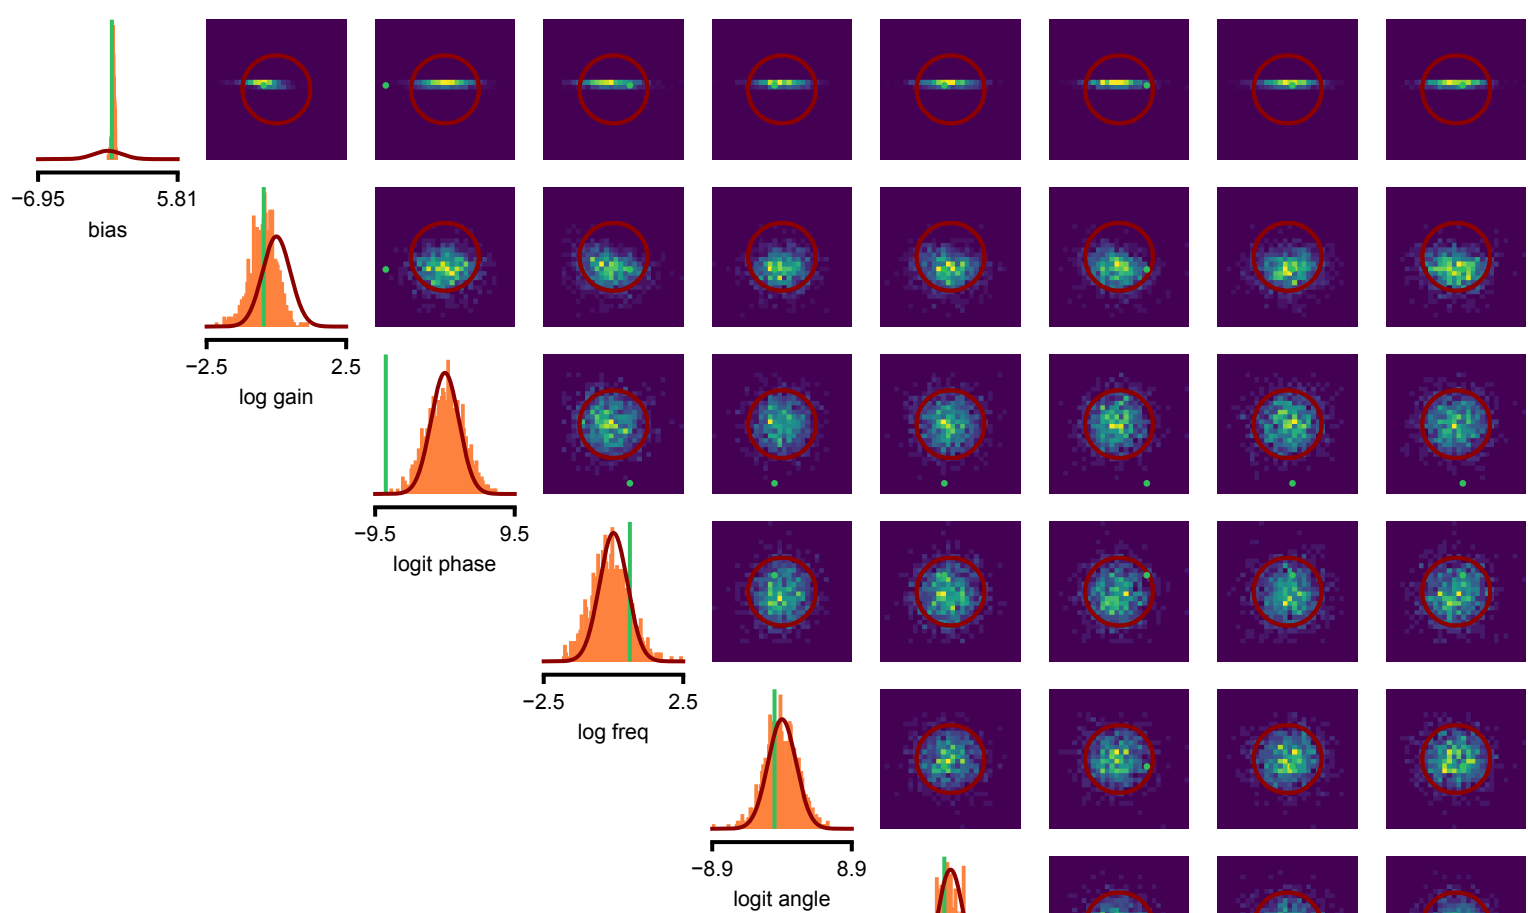

**c**

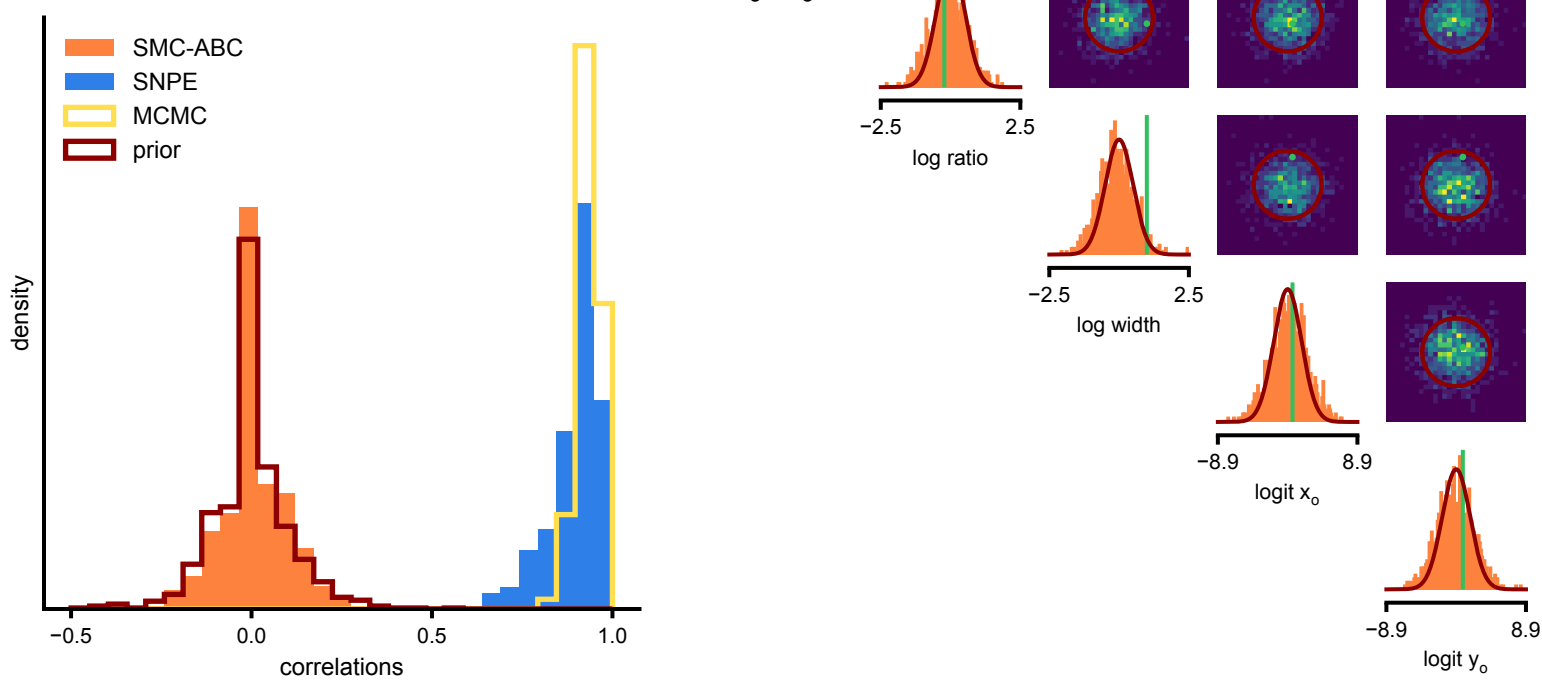

Supplement: supp [file elife-56261-supp-v1.zip › elife_poa_e56261_Appendix_1_figure_5.pdf]

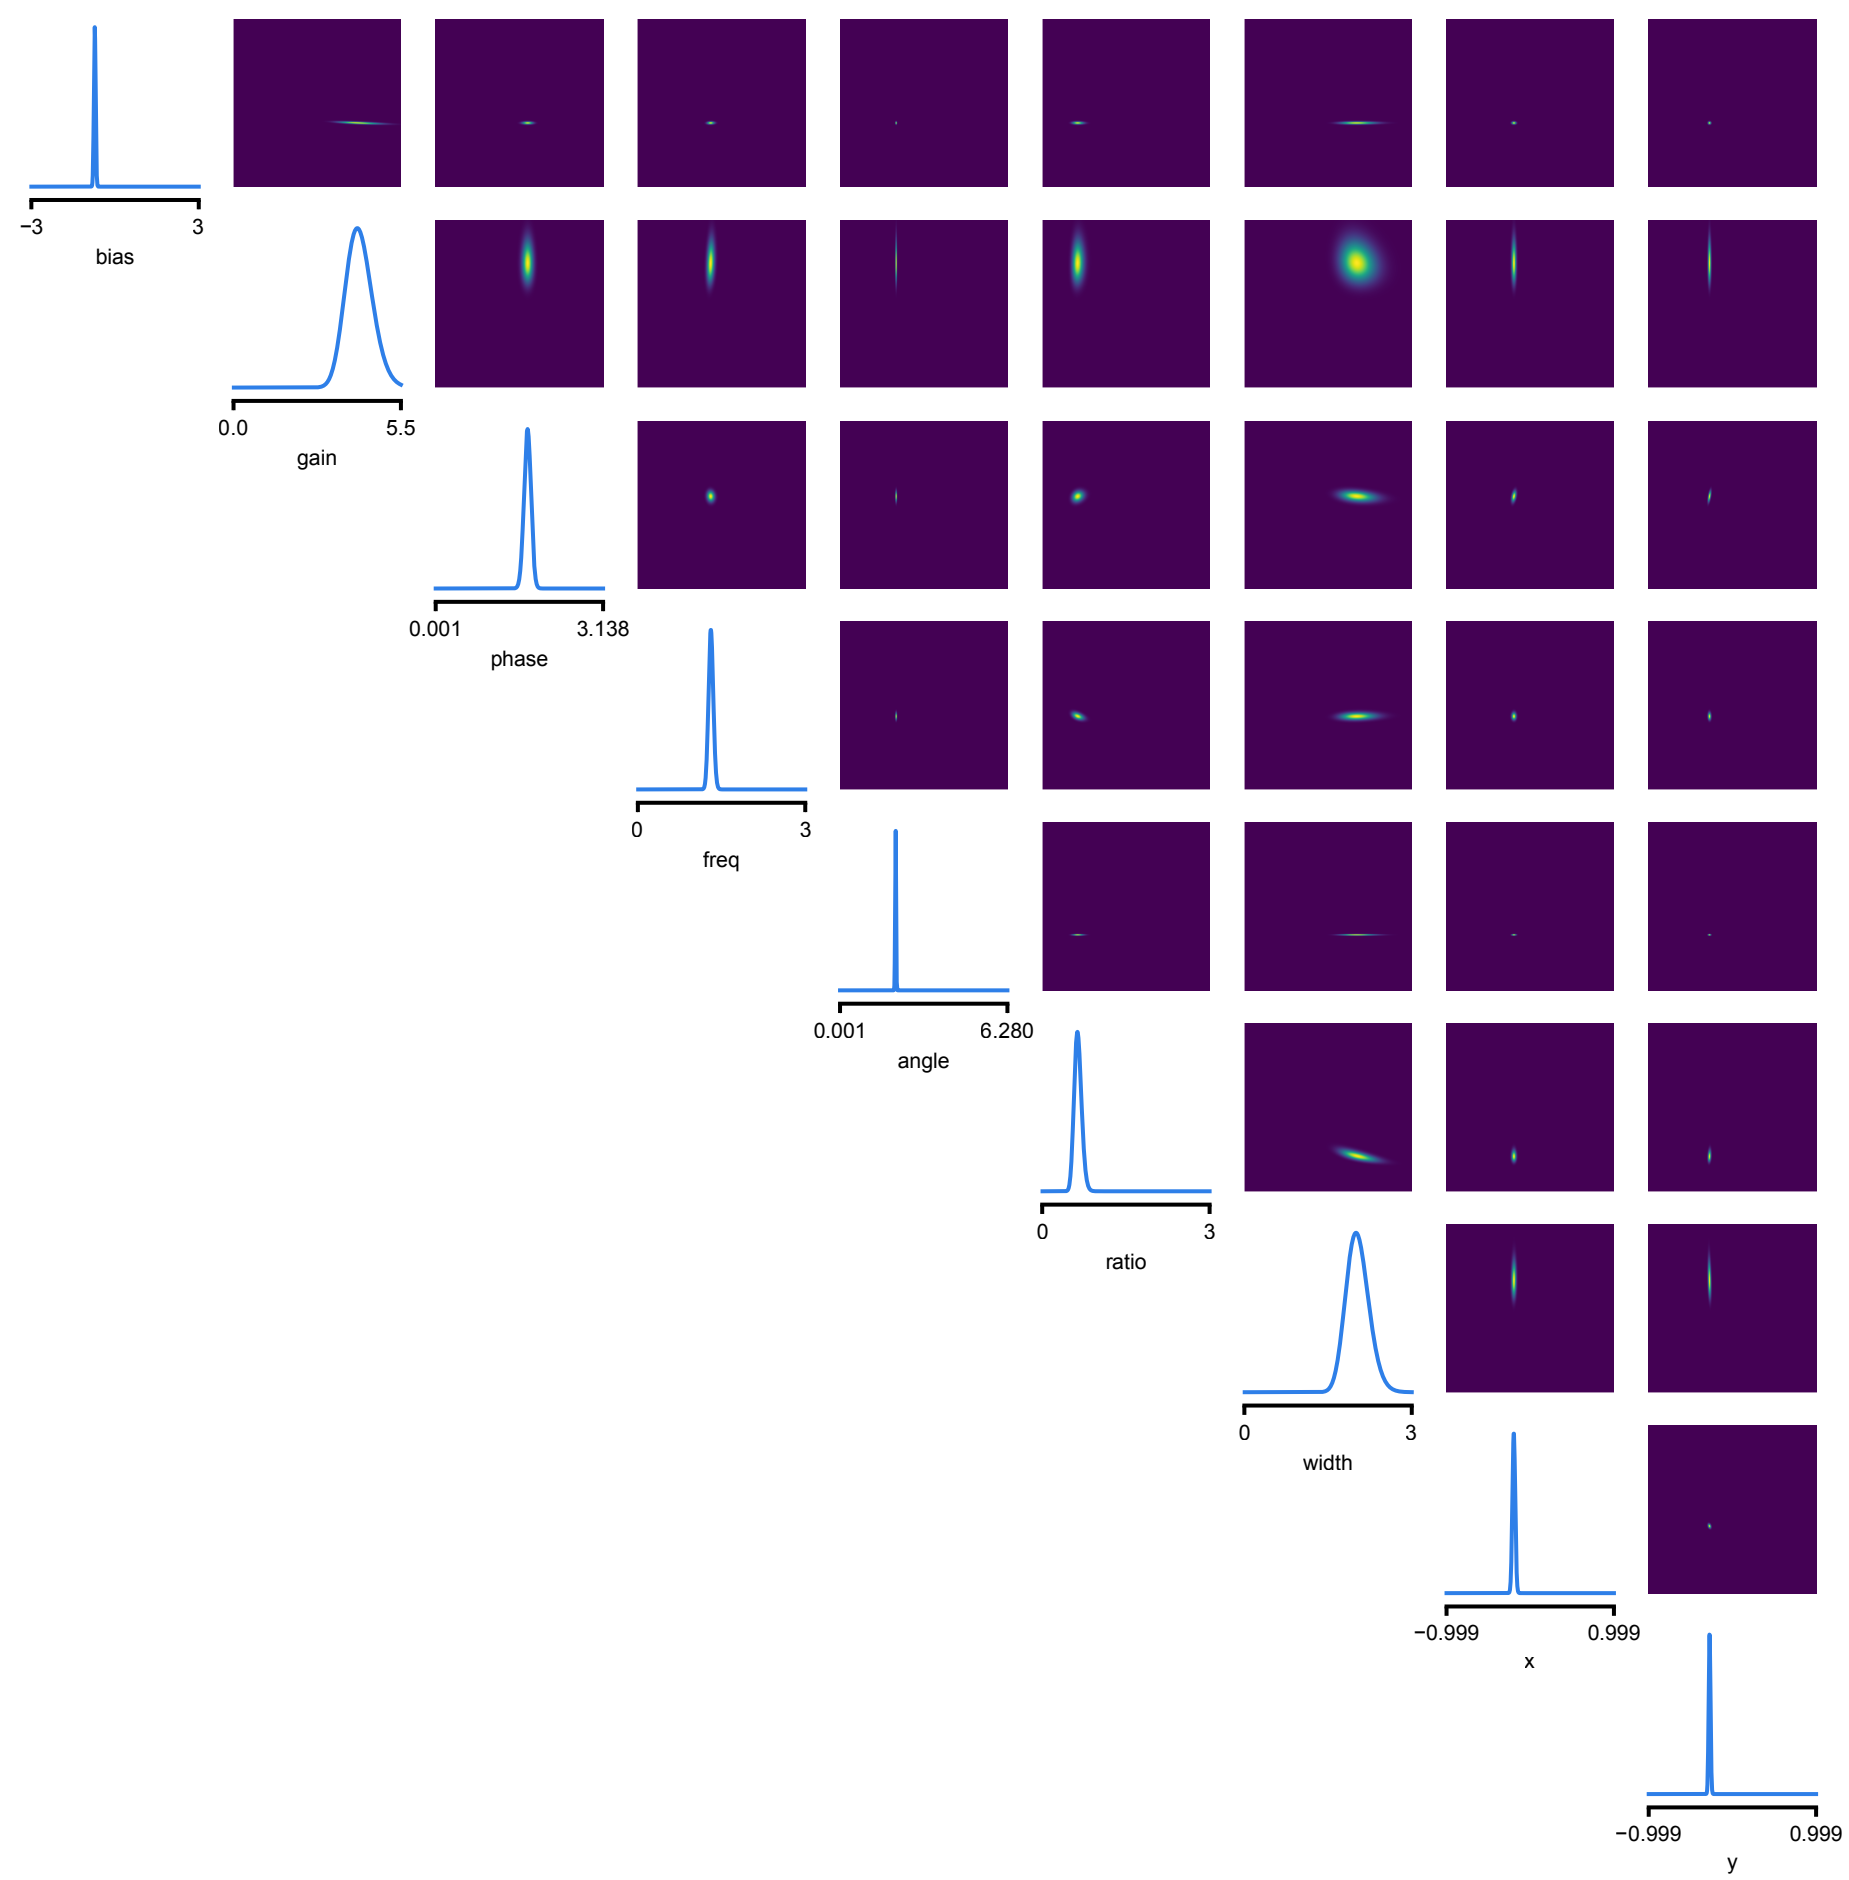

Supplement: supp [file elife-56261-supp-v1.zip › elife_poa_e56261_Appendix_1_figure_6.pdf]

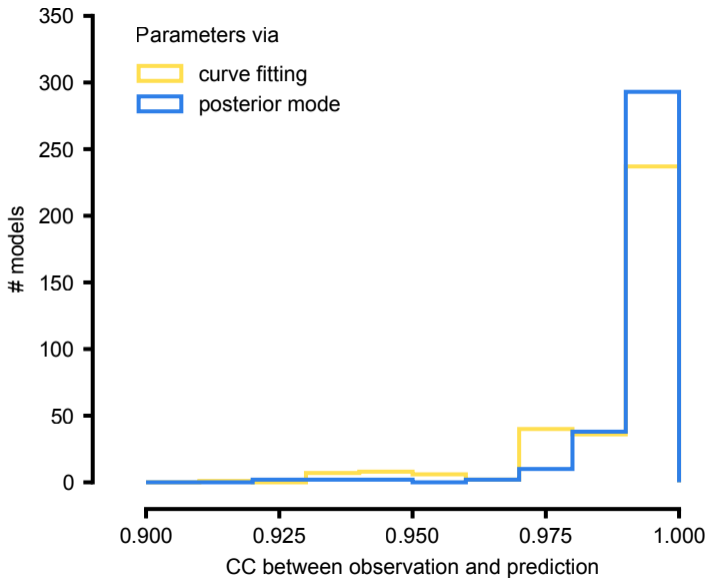

Supplement: supp [file elife-56261-supp-v1.zip › elife_poa_e56261_Appendix_1_figure_7.pdf]

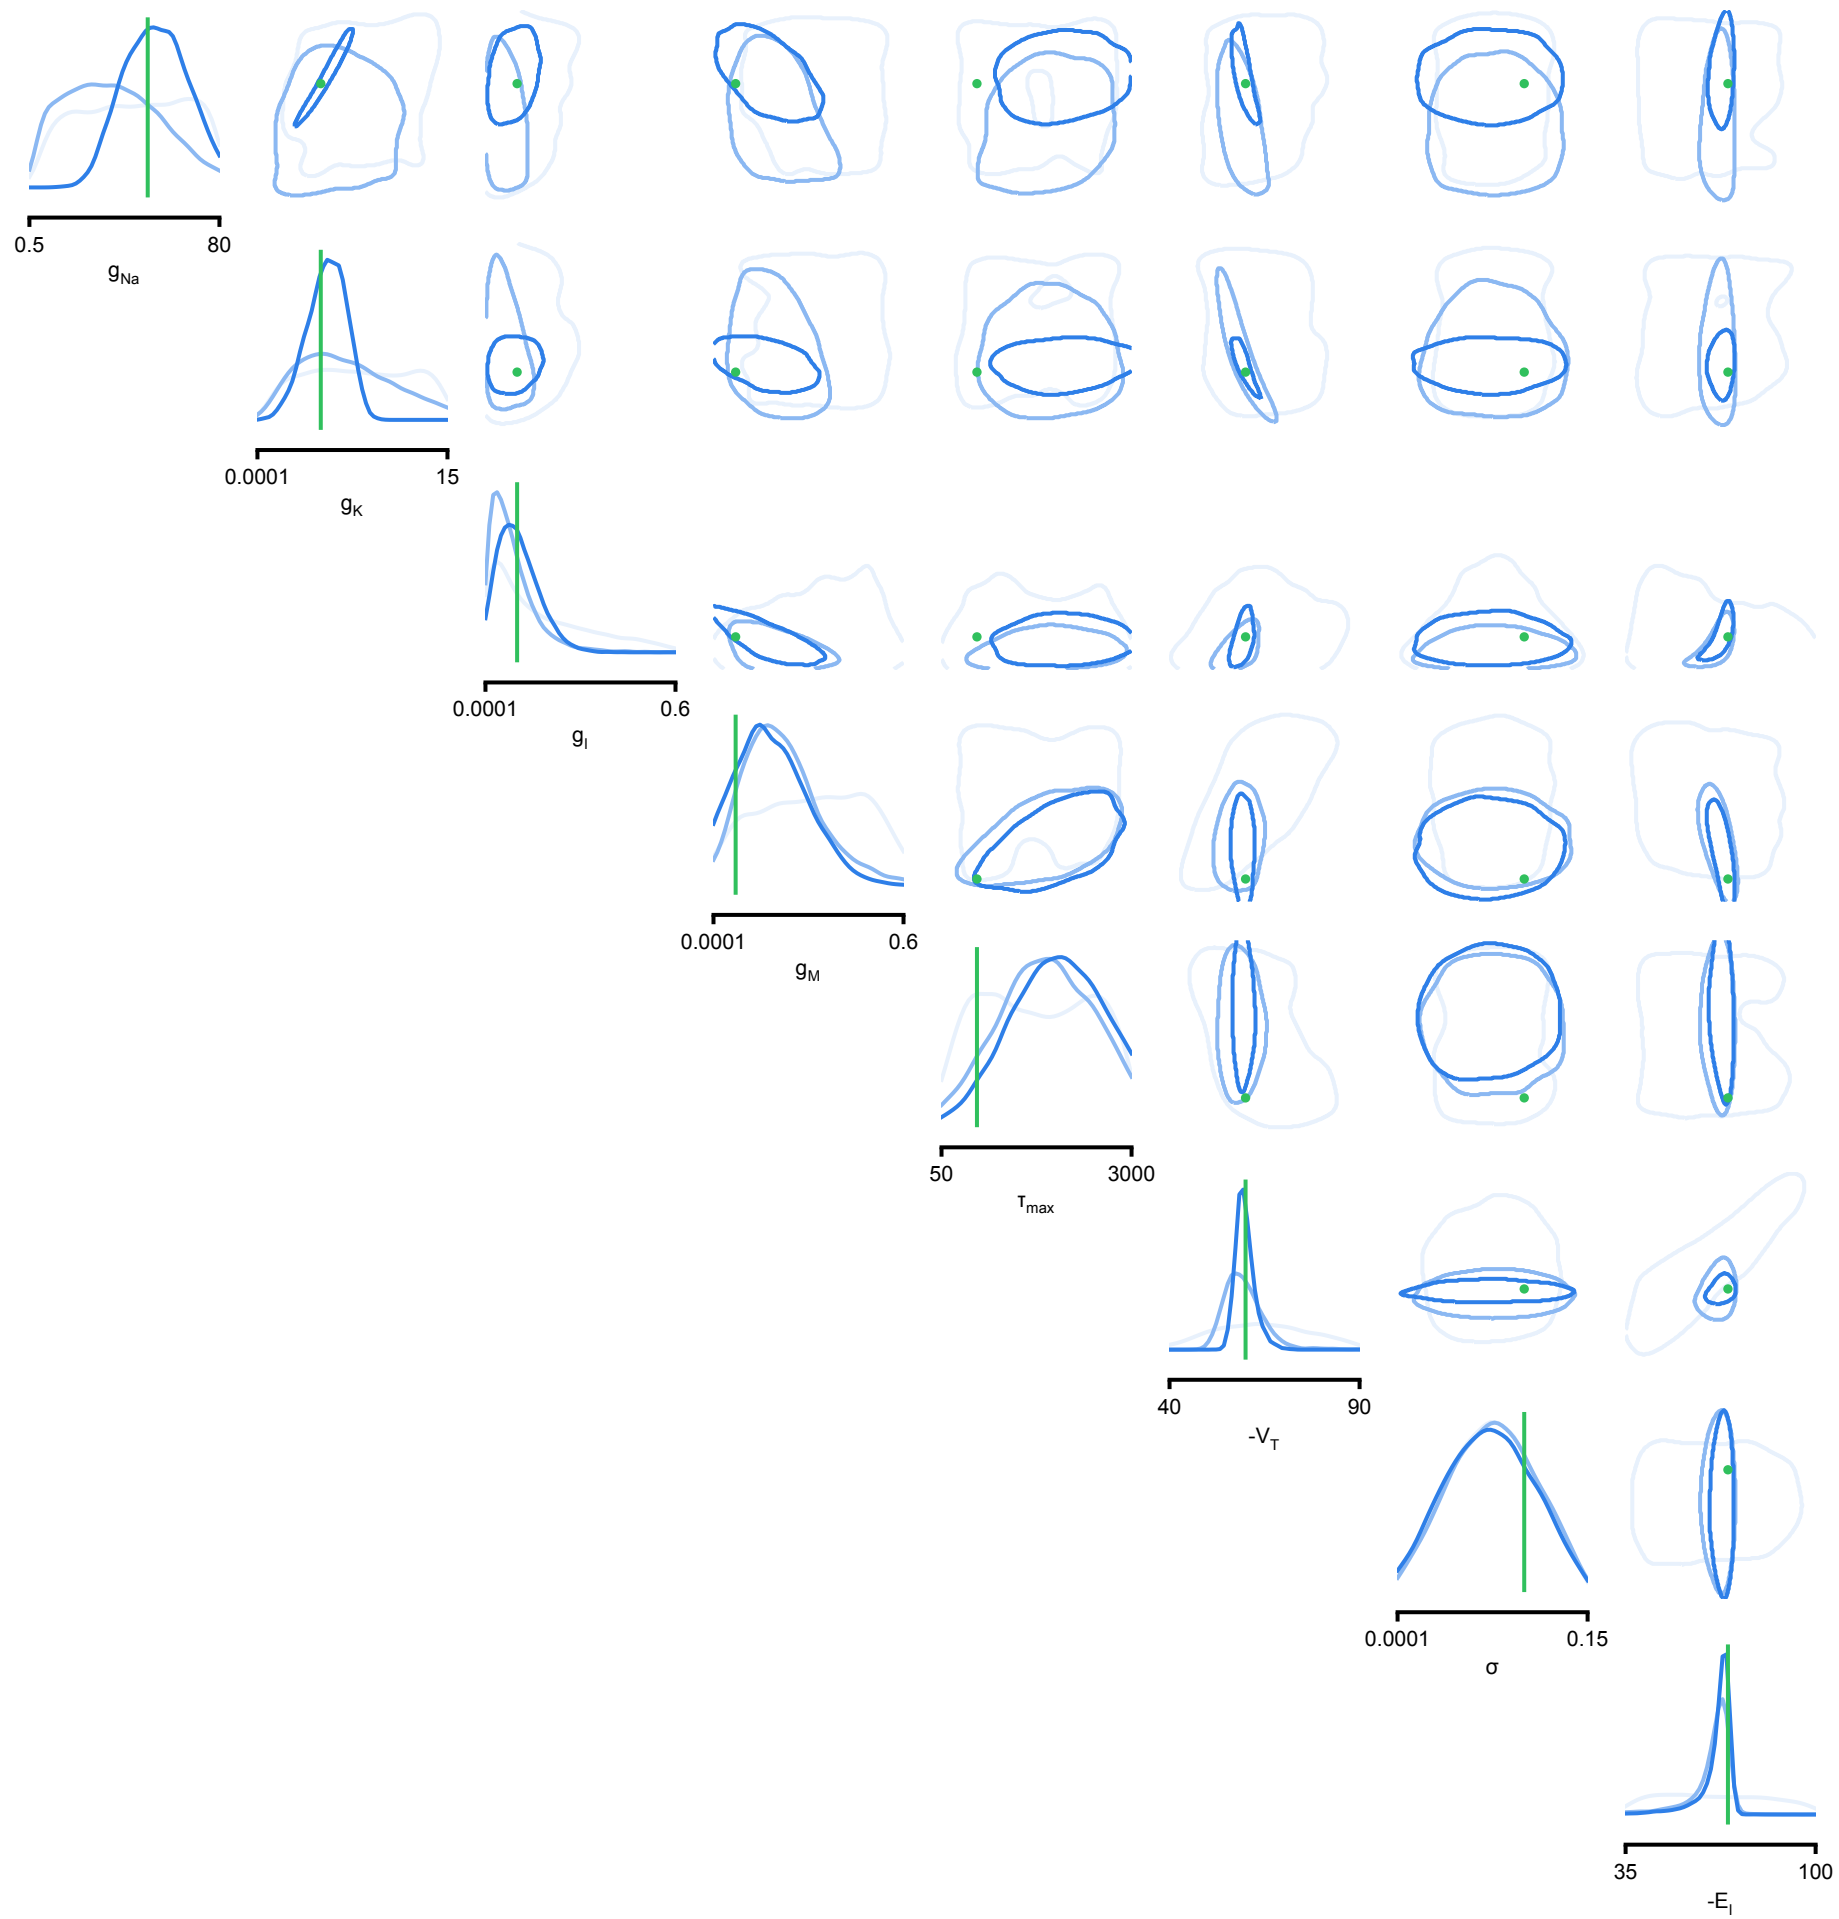

Supplement: supp [file elife-56261-supp-v1.zip › elife_poa_e56261_Appendix_1_figure_8.pdf]

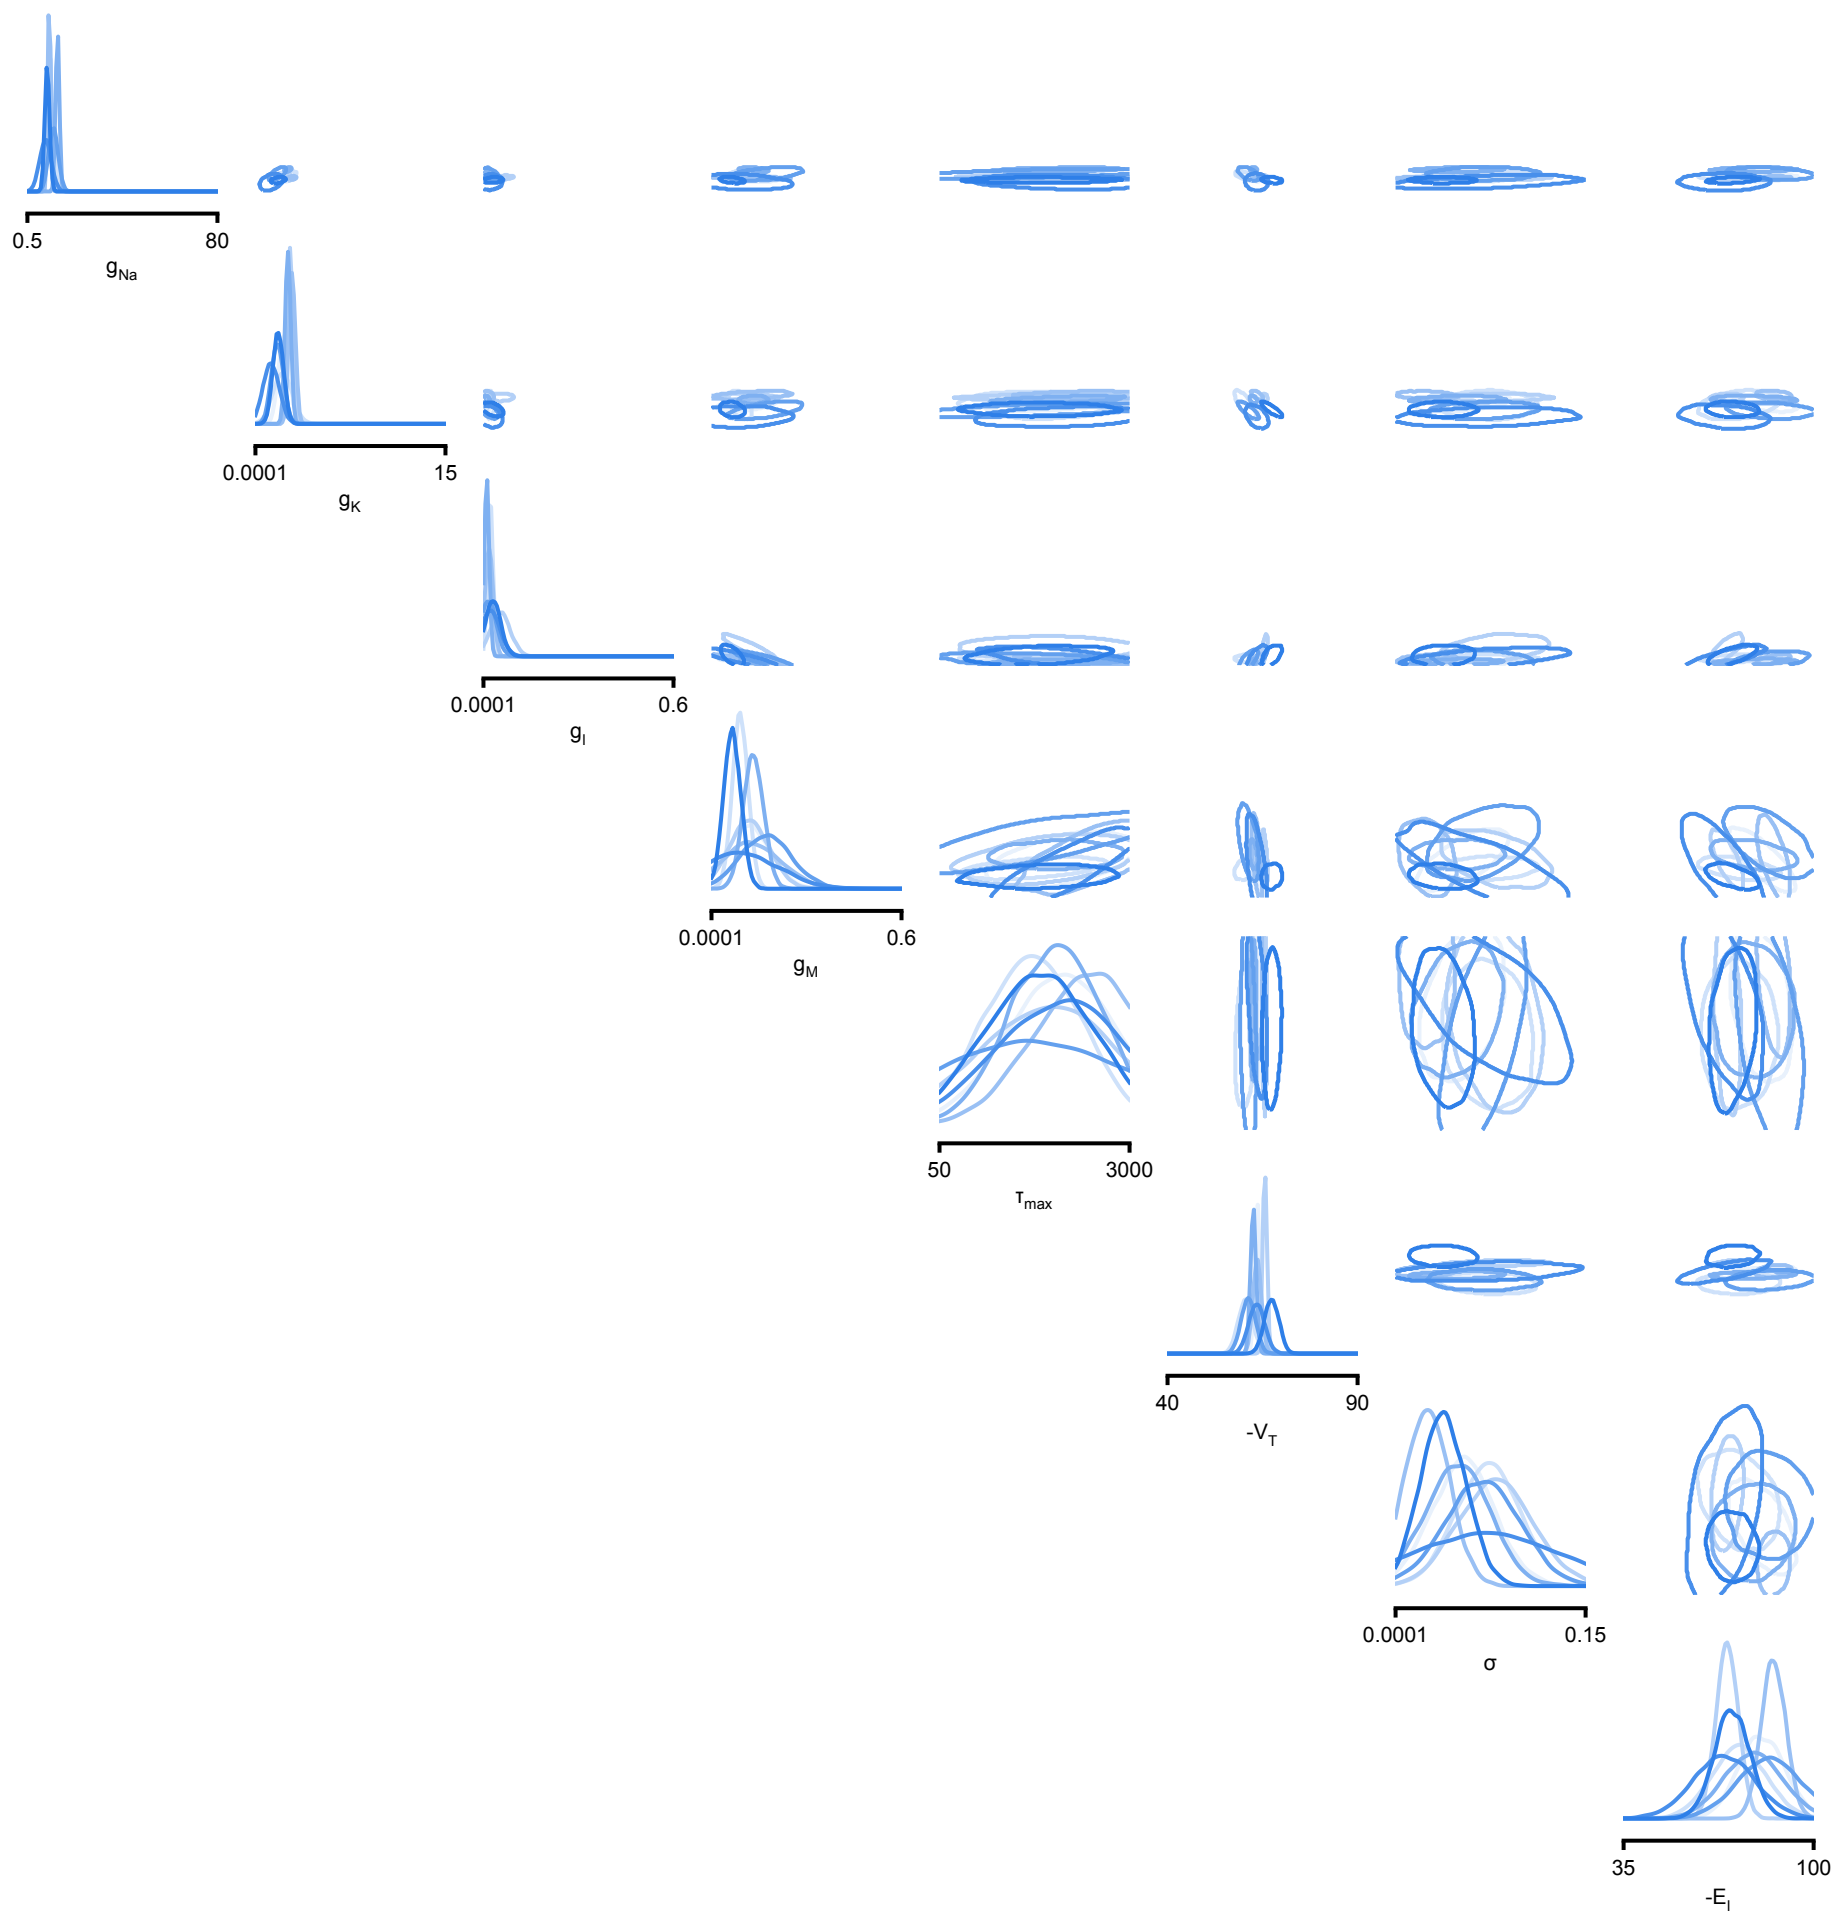

Supplement: supp [file elife-56261-supp-v1.zip › elife_poa_e56261_Appendix_1_figure_9.pdf]

**a**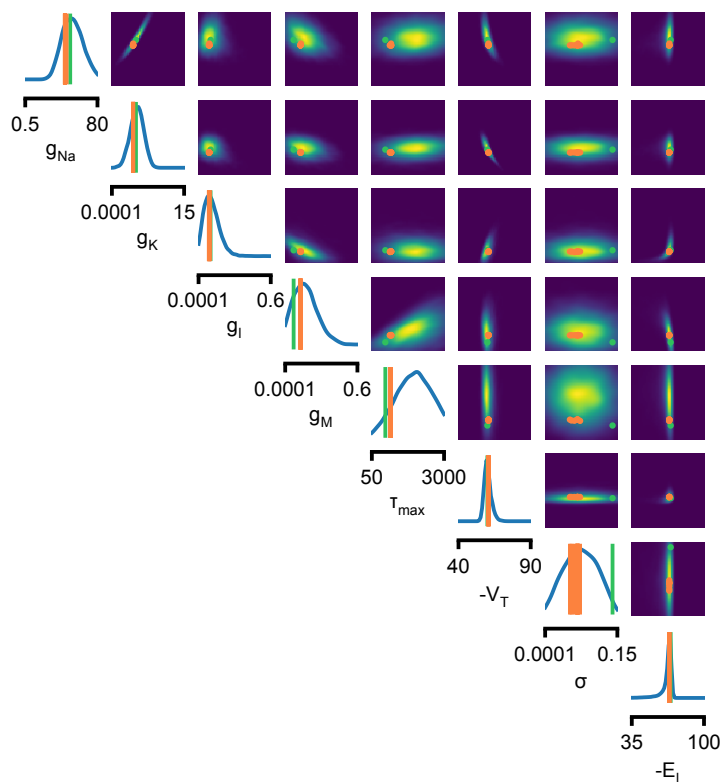**b**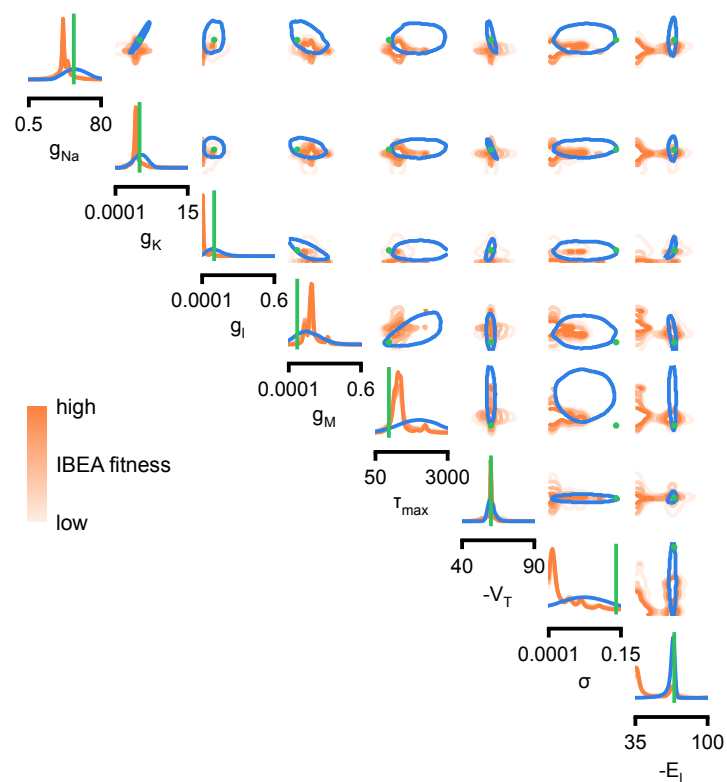**c**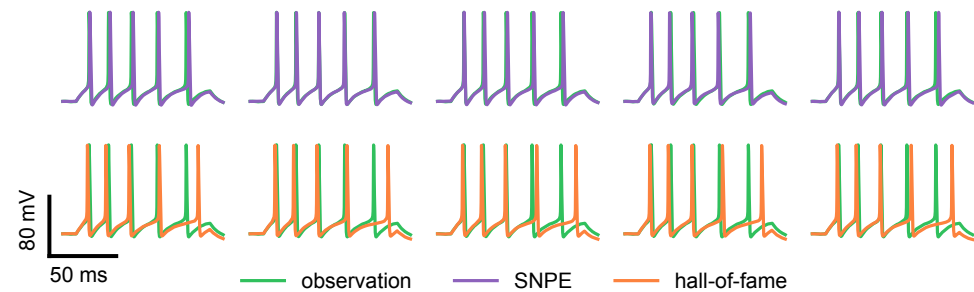**d**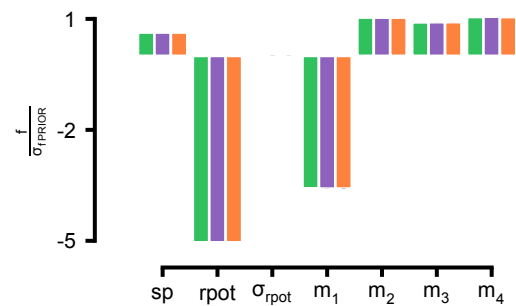

Supplement: supp [file elife-56261-supp-v1.zip › elife_poa_e56261_Appendix_1_figure_10.pdf]

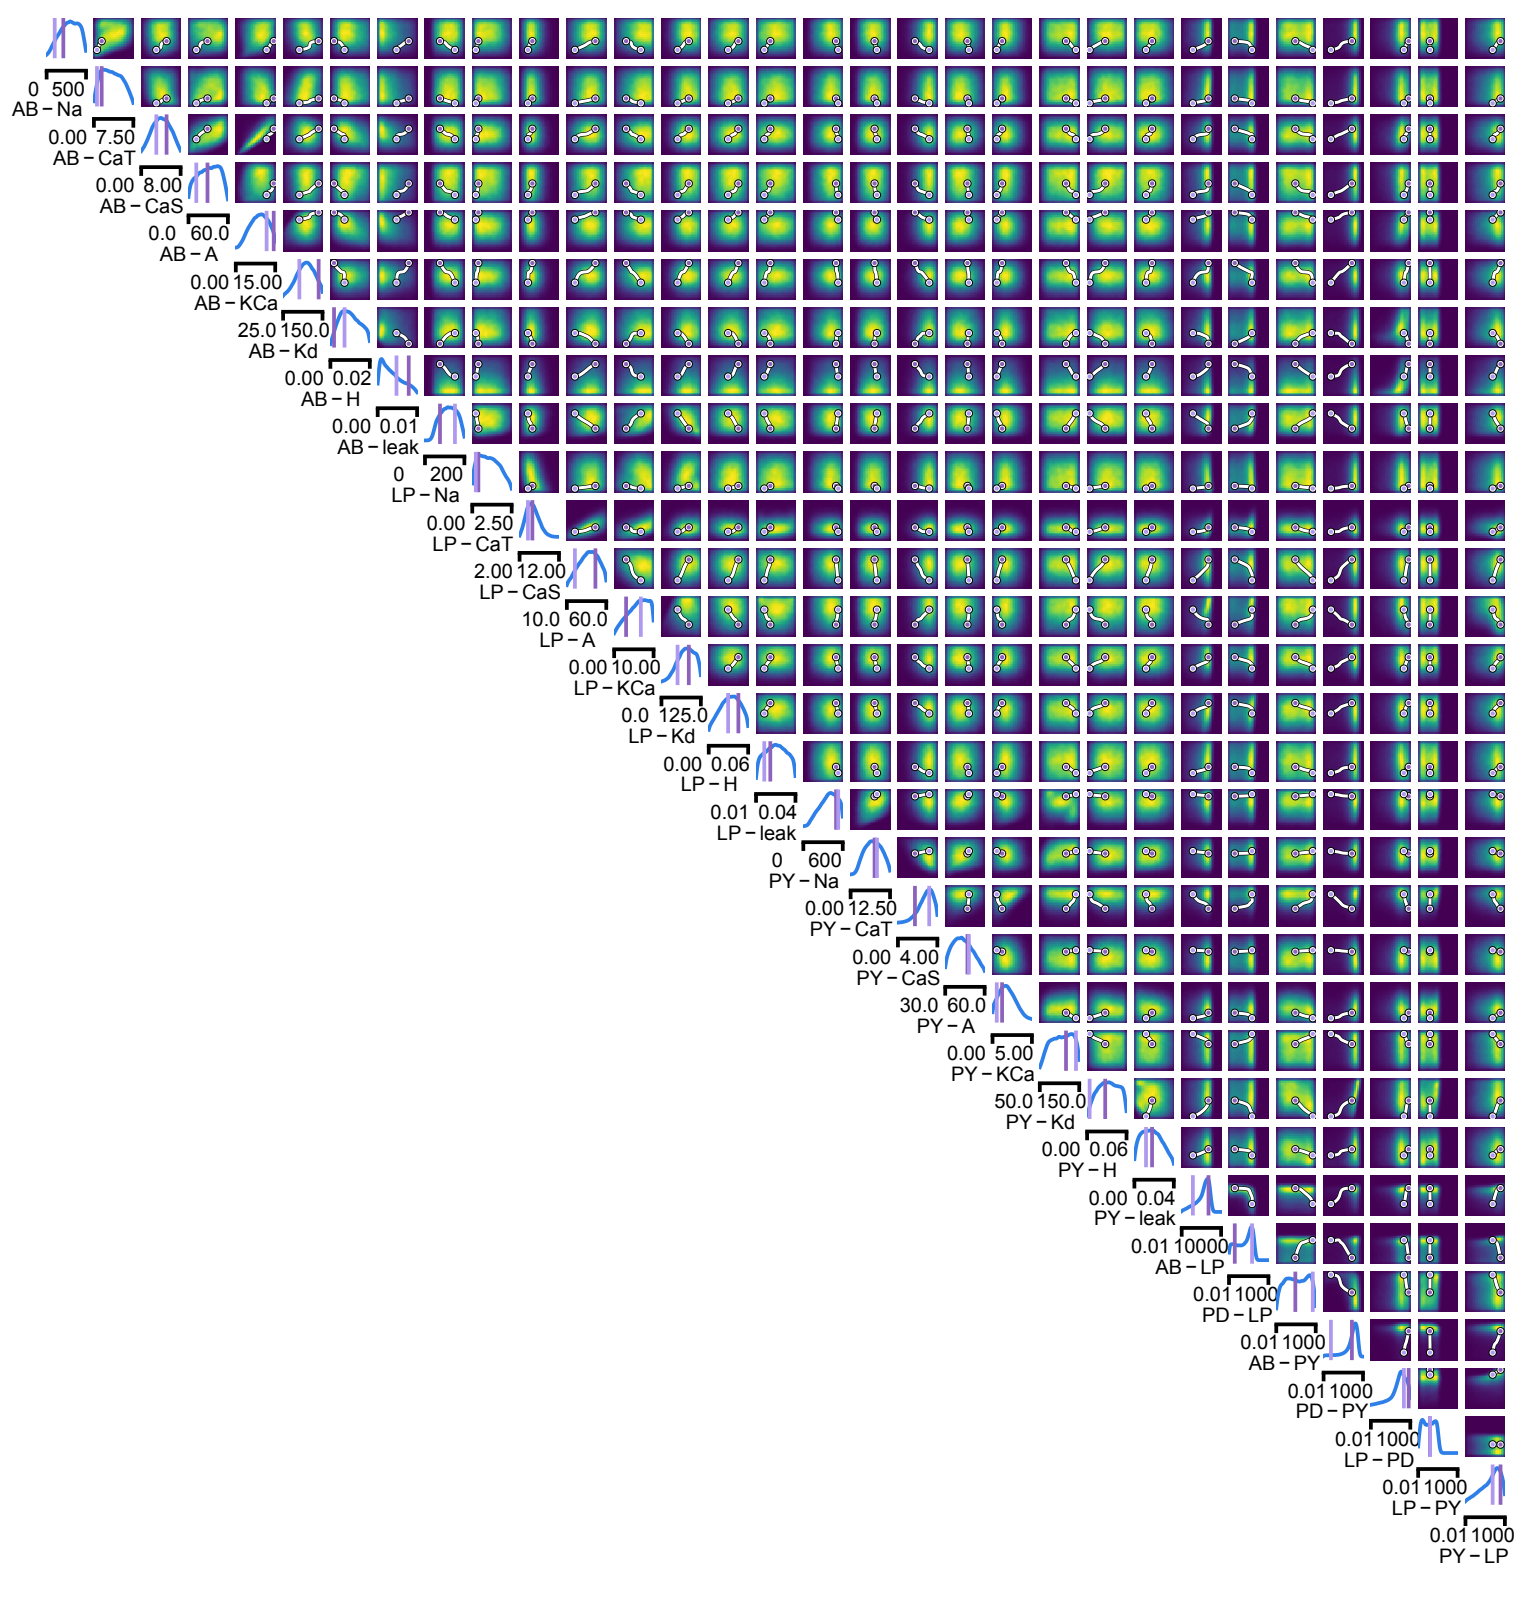

Supplement: supp [file elife-56261-supp-v1.zip › elife_poa_e56261_Appendix_1_figure_11.pdf]

**a**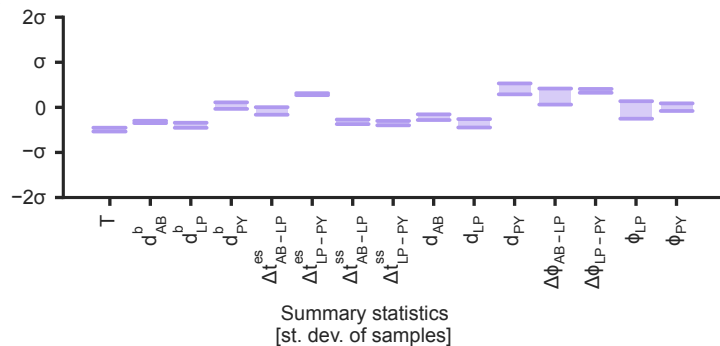**b**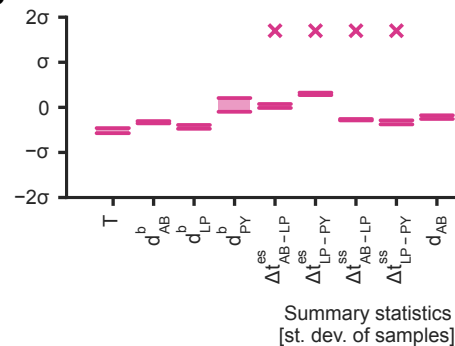**c**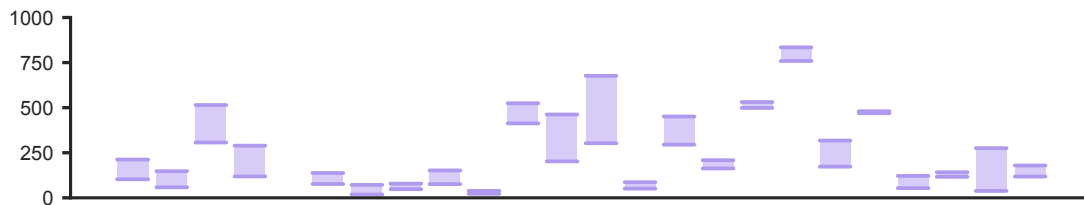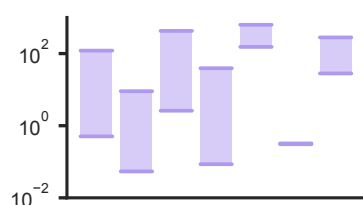**d**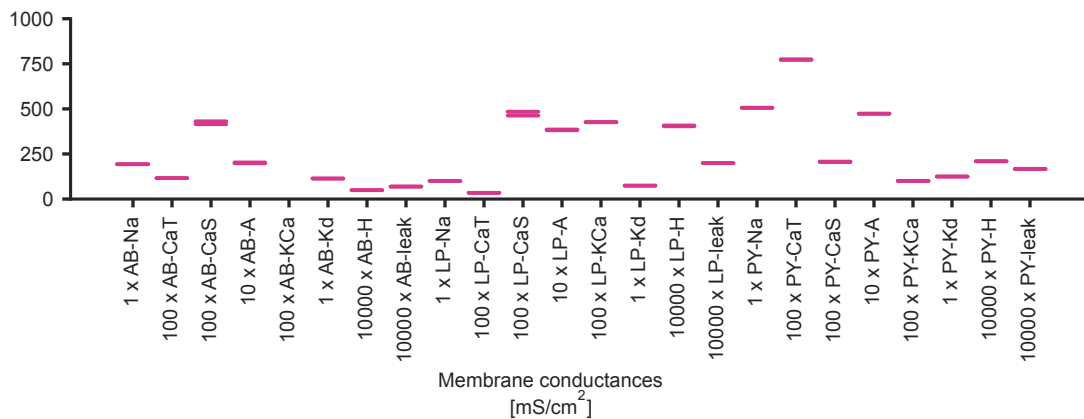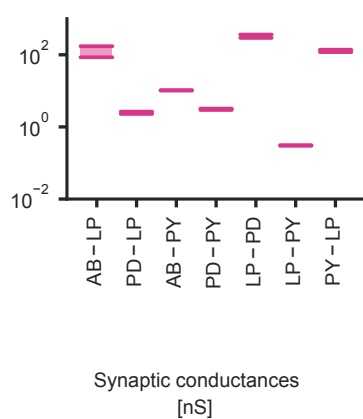

Supplement: supp [file elife-56261-supp-v1.zip › elife_poa_e56261_Appendix_1_figure_12.pdf]

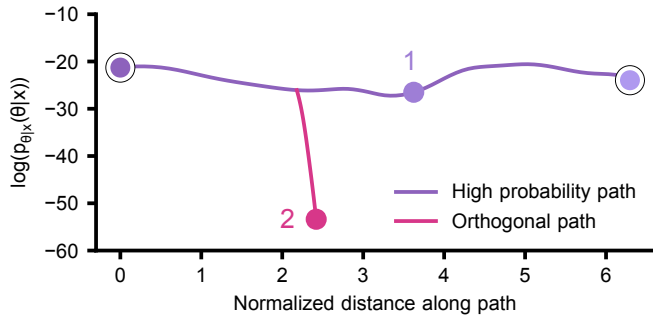

Supplement: supp [file elife-56261-supp-v1.zip › elife_poa_e56261_Appendix_1_figure_13.pdf]

**a**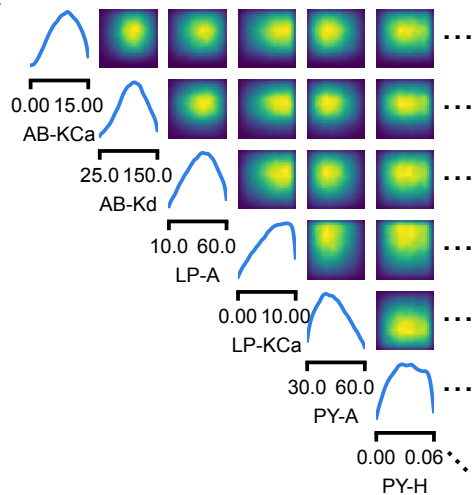**b**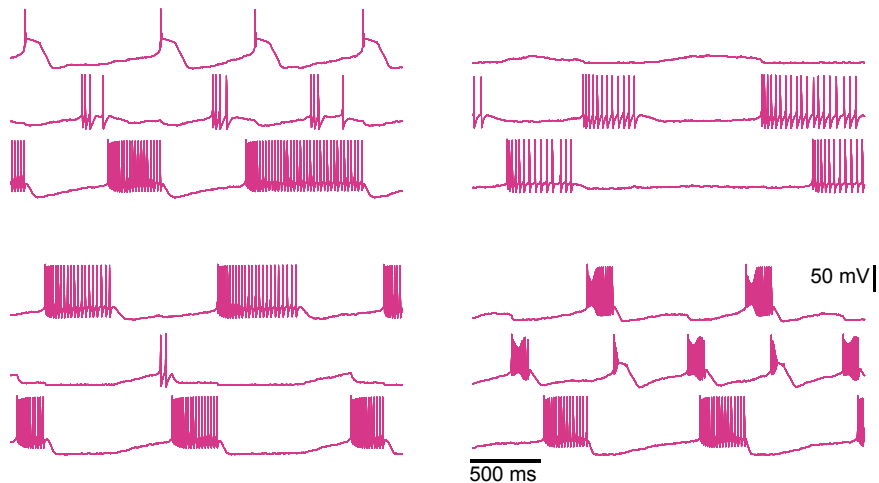**c**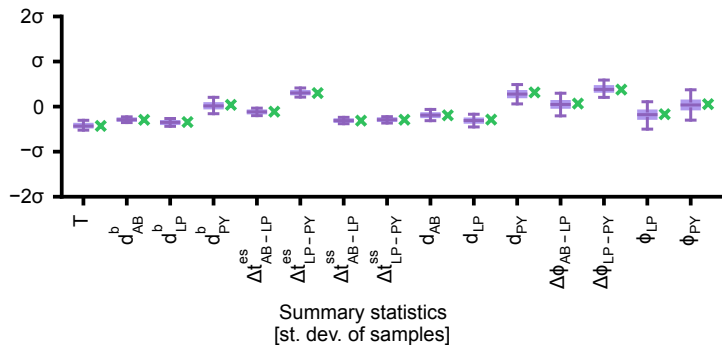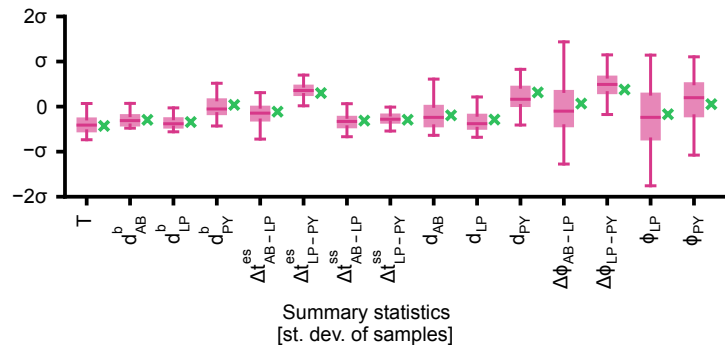

Supplement: supp [file elife-56261-supp-v1.zip › elife_poa_e56261_Appendix_1_figure_14.pdf]
